# Supplementary material for: The Inflammatory Response in Human Keratinocytes Exposed to Cinnamaldehyde Is Regulated by Nrf2
Source: MDPI journal article supplement (doi:10.3390/antiox11030575), 2022-03-17
Supplement: s1 [file s1]

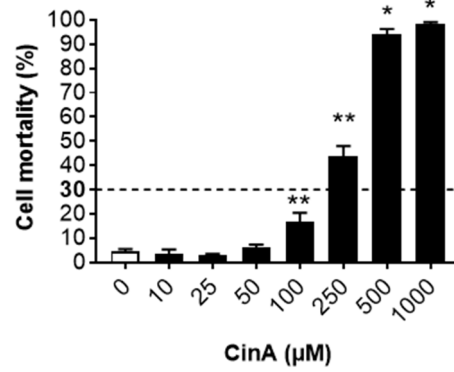

**Figure S1.** CinA induces cytotoxicity on KERTr. KERTr were exposed to different concentrations (25–250  $\mu\text{M}$ ) of CinA or DMSO 0.1% as the vehicle control for 24 h, and cellular toxicity was determined by propidium iodide staining. Data represent the results of 4 independent experiments and are expressed as the mean  $\pm$  SEM. \* Represents the statistical difference between CinA and DMSO-treated cells. \*  $p$ -value  $< 0.05$  and \*\*  $p$ -value  $< 0.01$  (Mann–Whitney test).

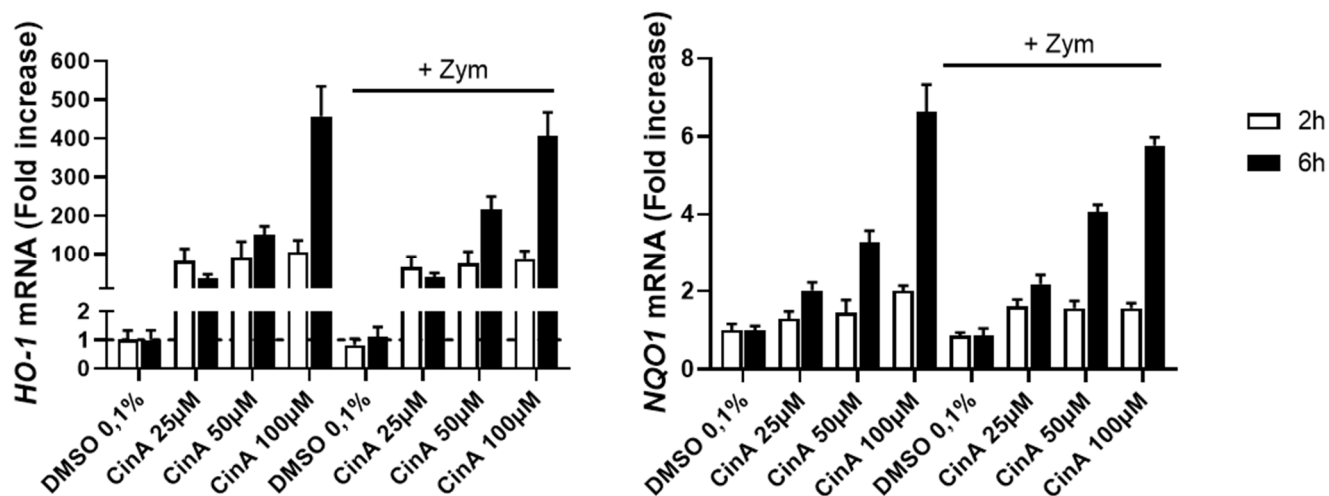

**Figure S2.** Zymosan does not modify the CinA-induced antioxidant response. KERTr were exposed to different concentrations (25–100 µM) of CinA alone or at the same time as zymosan A (20 µg/mL) stimulation for 2 and 6 h. The mRNA level of *HO-1* and *NQO1* determined by RT-qPCR after 2 and 6 h of exposure to CinA ± zymosan. Data represent the results of 6 independent experiments and are expressed as the mean ± SEM.

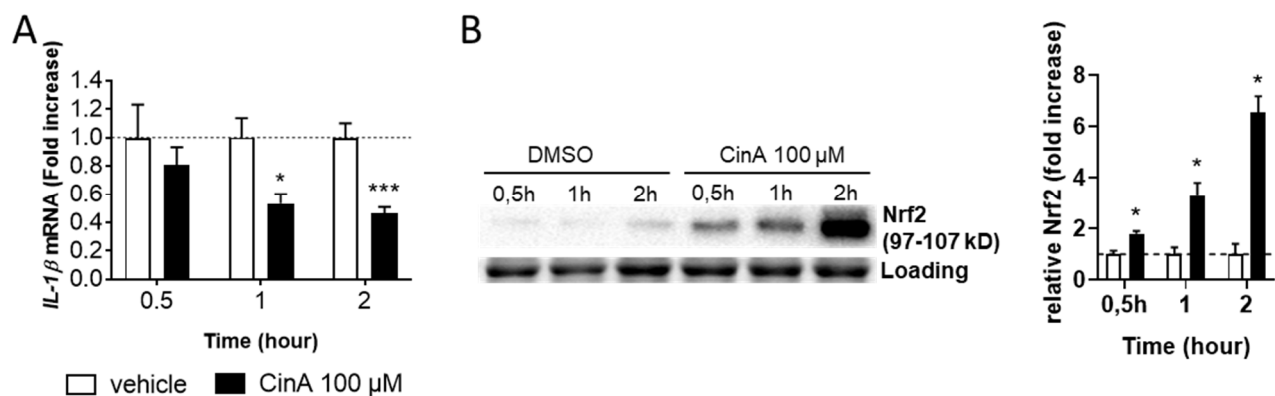

**Figure S3.** CinA-induced downregulation of IL-1 $\beta$  is concomitant to Nrf2 accumulation in KERTr. KERTr was exposed to 100  $\mu$ M of CinA or DMSO 0.1% as the vehicle control from 30 min to 2 h. (A) The mRNA level of IL-1 $\beta$  determined by RT-qPCR. (B) Western blot and relative quantification of Nrf2. Data represent the results of 3–11 independent experiments and are expressed as the mean  $\pm$  SEM. \* Represents the statistical difference between CinA and vehicle-treated cells. \*  $p$ -value < 0.05 and \*\*\*  $p$ -value < 0.001 (Mann-Whitney test).

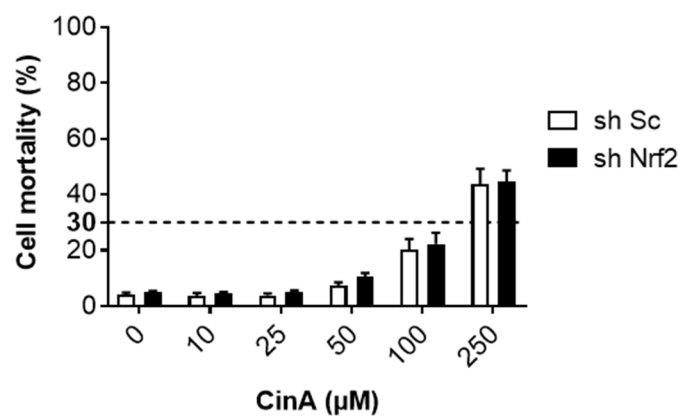

**Figure S4.** Invalidation of Nrf2 does not modify CinA-induced toxicity in KERTR. KERTR invalidated for Nrf2 (sh Nrf2) or not (sh ctrl) were exposed to different concentrations (10–250 μM) of CinA or DMSO 0.1% as the vehicle control for 24 h, and cellular toxicity was determined by propidium iodide staining. Data represent the results of 6 independent experiments and are expressed as the mean ± SEM.

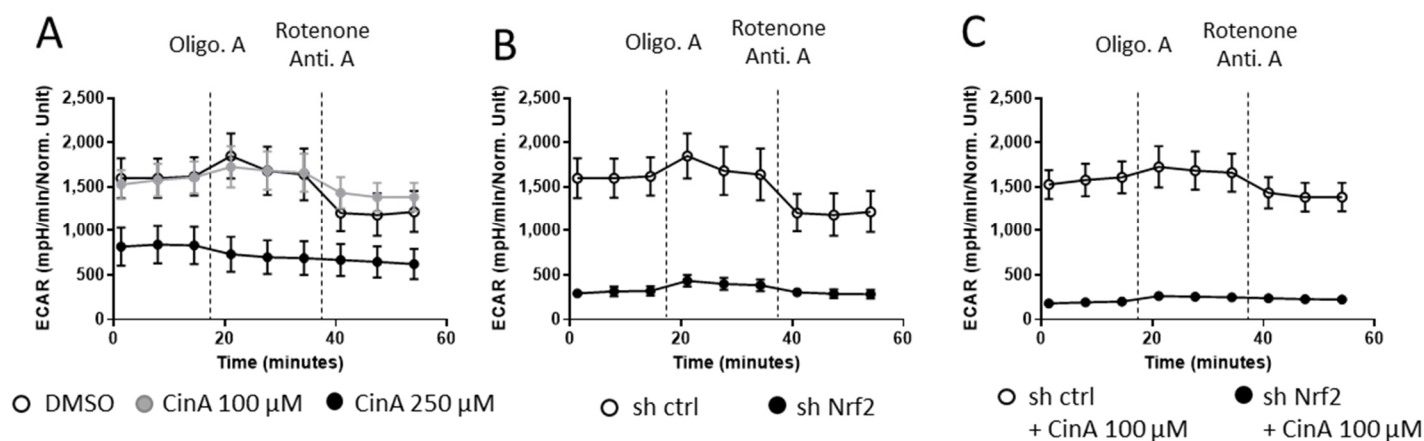

**Figure S5.** High concentrations of CinA and Nrf2 deficiency altered glycolysis in KERTr. KERTr were invalidated for Nrf2 by transduction with lentiviral particles to express a short-hairpin RNA targeting Nrf2 (sh Nrf2) or a scrambled short-hairpin (sh ctrl) as the control cells, and the cells were exposed to 100 or 250  $\mu$ M of CinA for 1 h, followed by the seahorse analysis. (A) Extracellular acidification rate (ECAR) of sh ctrl cells exposed to CinA (100 or 250  $\mu$ M) and DMSO 0.1% as the control. (B) ECAR of unstimulated sh ctrl and sh Nrf2 cells. (C) ECAR of sh ctrl and sh Nrf2 cells exposed to 100  $\mu$ M of CinA and DMSO 0.1% as the control. Data represent the results of 1 experiment with 8 replicates.
